# Supplementary material for: Huntingtin is an RNA binding protein and participates in NEAT1-mediated paraspeckles
Source: PubMed Central journal article supplement (PMC11259171; doi:10.1126/sciadv.ado5264), 2024-07-19
Supplement: sciadv.ado5264_sm.pdf [file sciadv.ado5264_sm.pdf]

Supplementary Materials for  
**Huntingtin is an RNA binding protein and participates in  
*NEAT1*-mediated paraspeckles**

Manisha Yadav *et al.*

Corresponding author: Cheryl H. Arrowsmith, [cheryl.arrowsmith@uhn.ca](mailto:cheryl.arrowsmith@uhn.ca)

*Sci. Adv.* **10**, eado5264 (2024)  
DOI: 10.1126/sciadv.ado5264

**The PDF file includes:**

Figs. S1 to S9  
Tables S1 and S2  
Legend for data S1

**Other Supplementary Material for this manuscript includes the following:**

Data S1

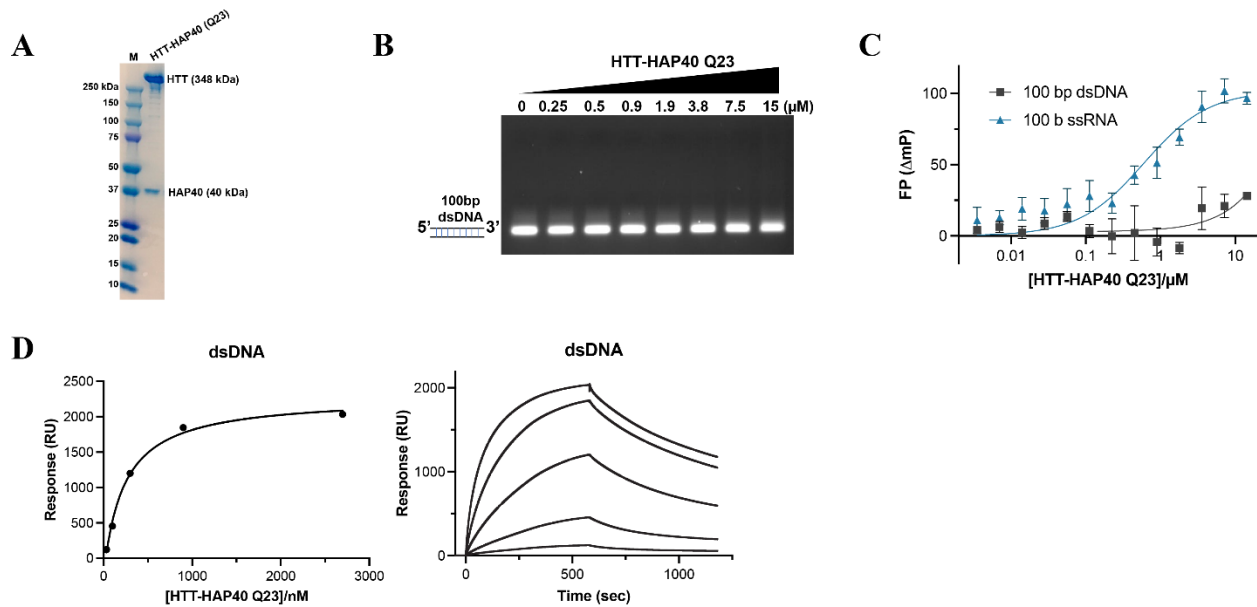

**Fig. S1. HTT-HAP40 prefers to bind RNA and prefers G-rich sequences.** (A) SDS-PAGE analysis showing recombinantly purified HTT-HAP40 Q23 protein after gel filtration chromatography purification. (B) Representative EMSA image of increasing HTT-HAP40 Q23 protein (0–15  $\mu\text{M}$ ) binding with 1  $\mu\text{M}$  of 100bp dsDNA. DNA is in black. EMSA, electrophoretic mobility shift assay. (C) Representative FP binding curve of HTT-HAP40 Q23 and 100-mer random ssRNA ( $K_D = 1 \pm 0.6 \mu\text{M}$ ), dsDNA ( $K_D = \text{NC}$ ). NC, not calculated, outside of range of protein concentrations tested. (D) Representative SPR binding curve and sensorgram of HTT-HAP40 Q23 and 100bp dsDNA ( $K_D = 2.0 \pm 0.2 \mu\text{M}$ ).

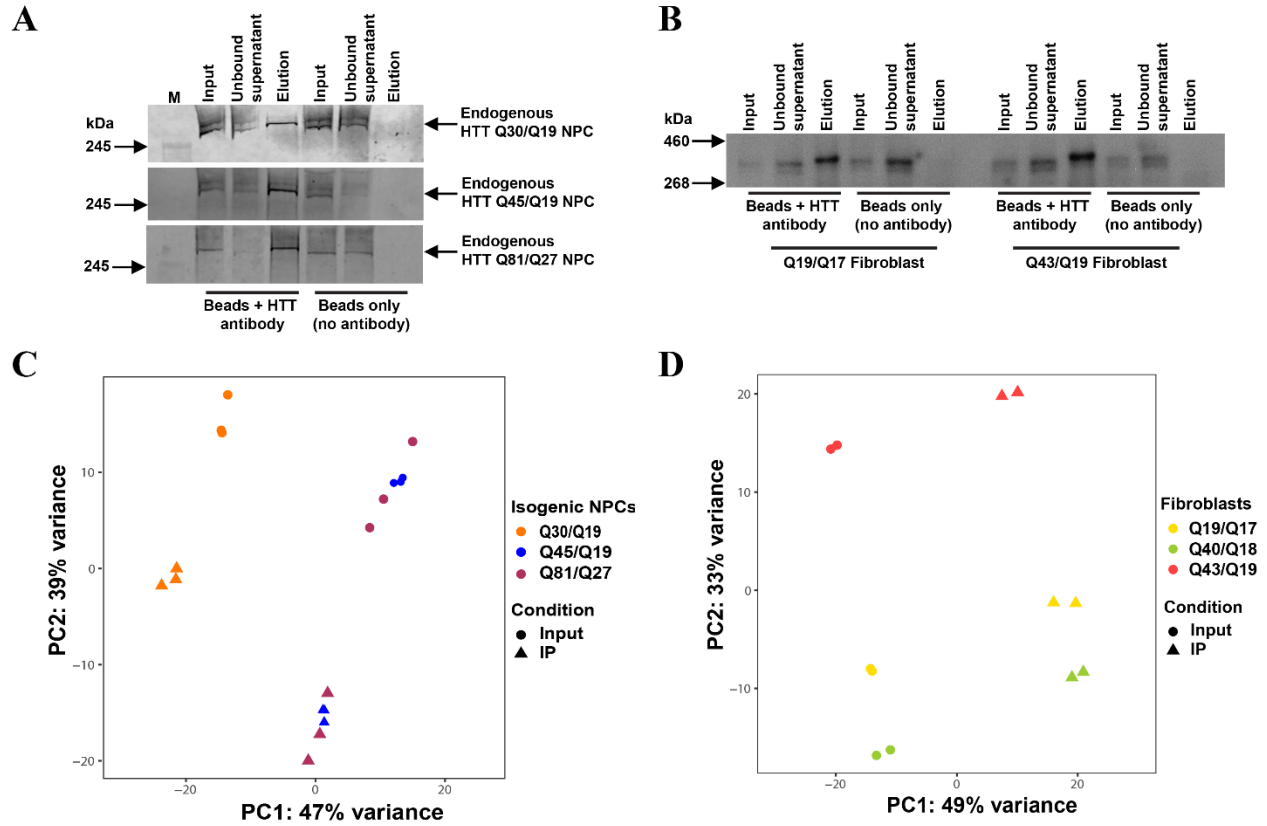

**Fig. S2. HTT RIP-seq analysis in isogenic NPCs and fibroblasts. (A-B) Validation of HTT IP protocol through western blot analysis in NPCs (A) and fibroblast cell lines (B). (C-D) Principal components analysis (PCA) of RIP-seq dataset of WT and HD isogenic NPCs (C) in triplicates, and fibroblast (D) cell lines in duplicates.**

**A**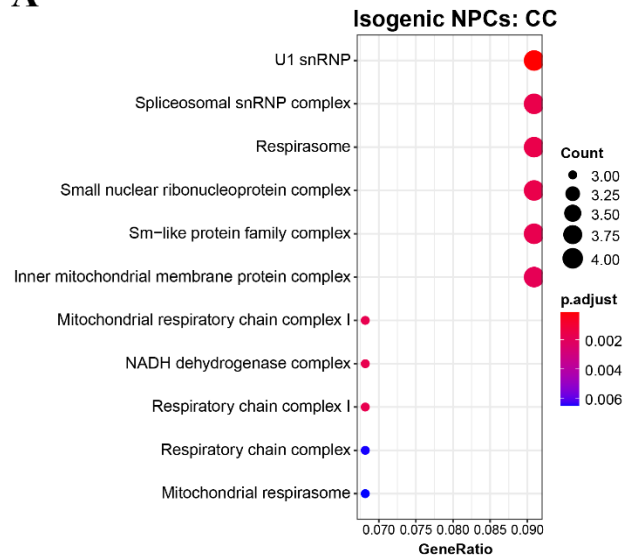**B**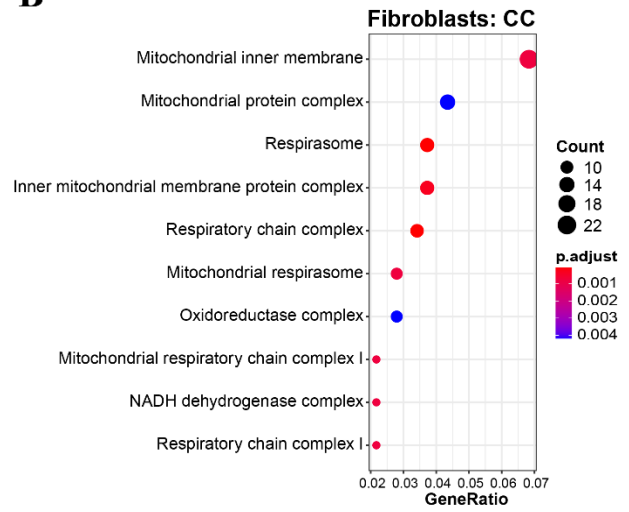

**Fig. S3. HTT RIP-seq analysis in isogenic NPCs and fibroblasts. (A-B) GO enrichment analysis for cellular component (CC) in WT and expanded NPCs (A) and fibroblasts (B).**

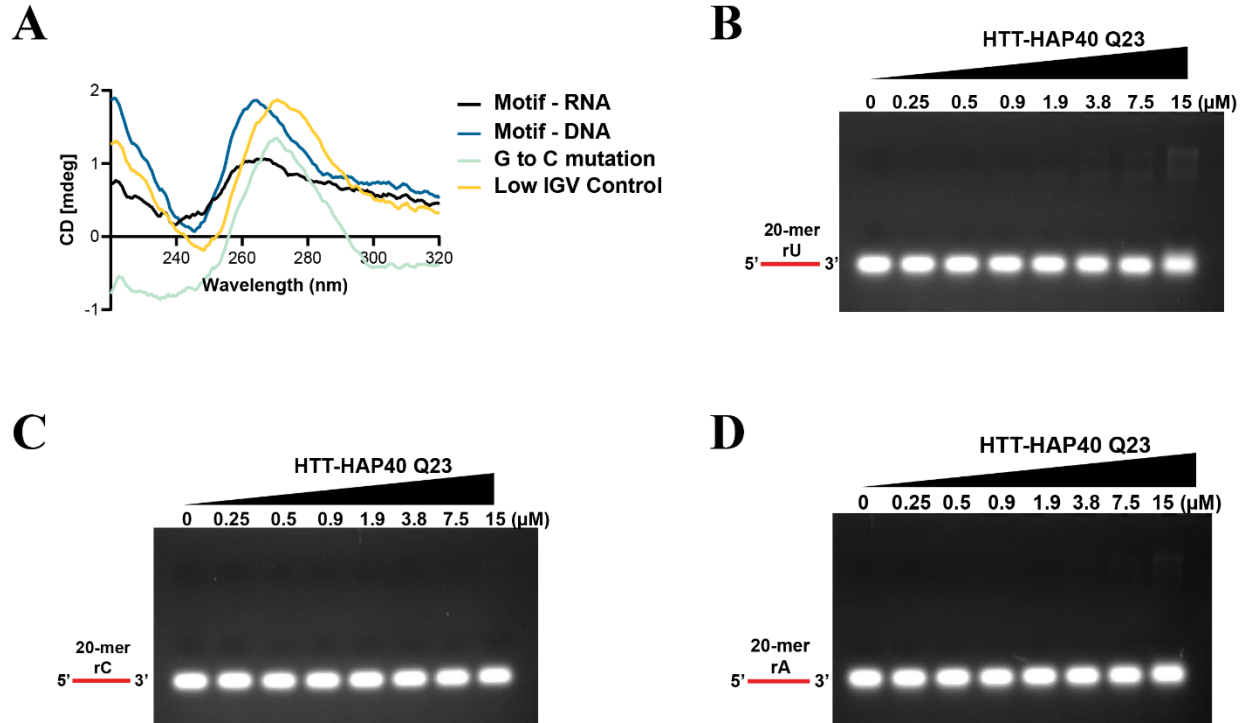

**Fig. S4. (A)** Circular Dichroism (CD) spectroscopy analysis for secondary structure folding of identified RNA motif (Motif-RNA), RNA to DNA motif (Motif-DNA), G to C mutated RNA, and low IGV RNA. The CD spectral features of G4 topologies exhibit peak wavelengths of  $\approx 264$  nm at maximum and  $\approx 245$  nm at minimum (34). **(B-D)** Representative EMSA images of increasing HTT-HAP40 Q23 protein (0–15  $\mu\text{M}$ ) binding with 1  $\mu\text{M}$  of indicated 20-mer rU (B), rC (C), and rA (D) substrates. RNA is in red. EMSA, electrophoretic mobility shift assay.

**A**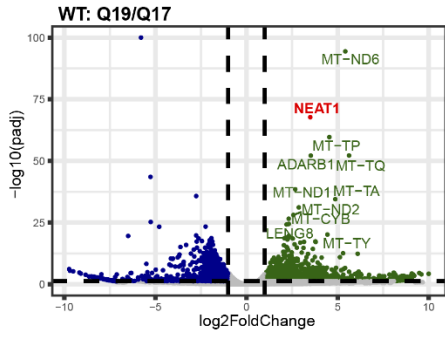**B**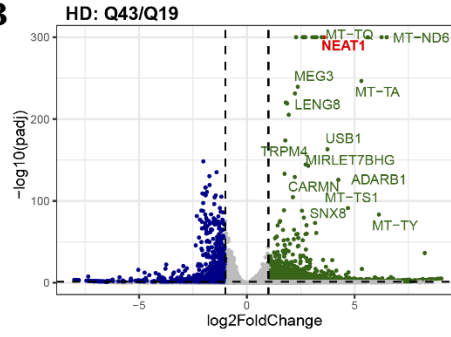**C**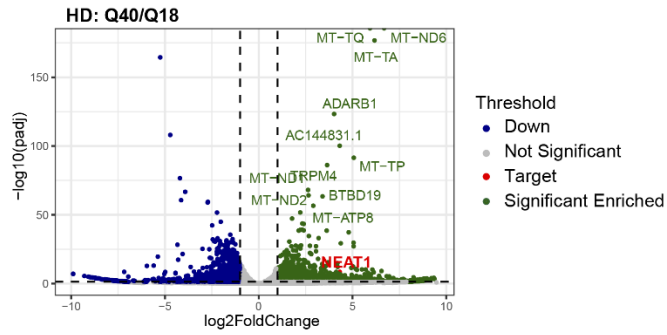**D**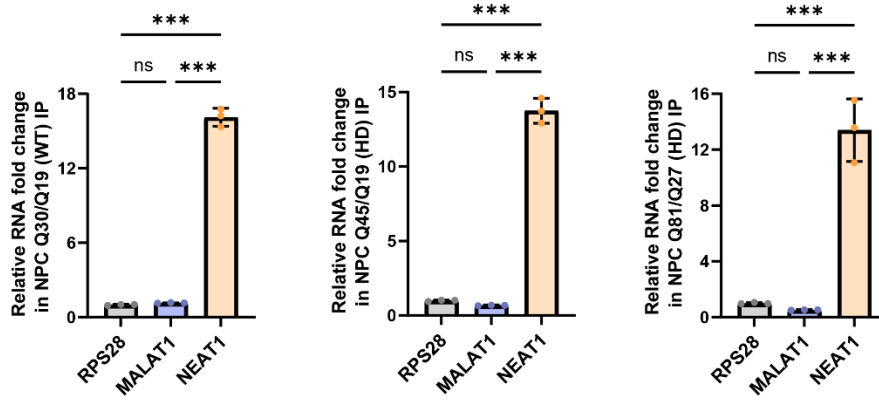**E**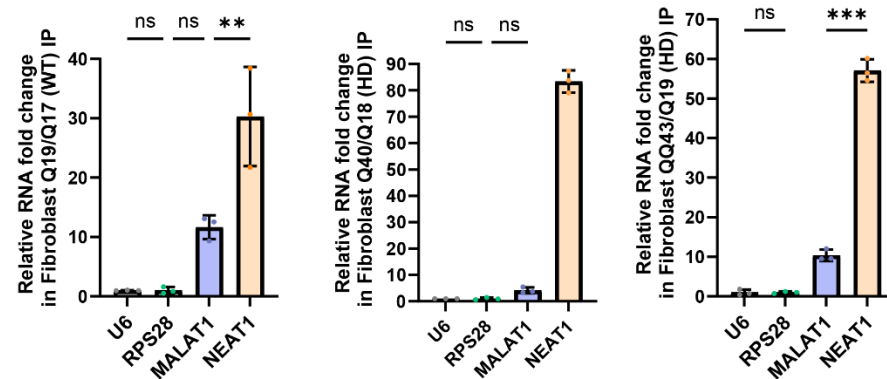

**Fig. S5. LncRNA NEAT1 enrichment validation using RT-qPCR.** (A-C) NEAT1 is significantly enriched in the WT and HD IP samples derived from fibroblast cells (Log<sub>2</sub> fold change cutoff: 1; p-value cutoff: 0.05). (D-E) Both form-specific (total NEAT1) and long form-specific (NEAT1\_2) enrichment evaluation by RT-qPCR from WT and expanded isogenic NPCs (D) and fibroblasts (E). Three abundant coding and noncoding transcripts (RPS28, U6 and MALAT1) are shown as negative controls. Data was analyzed using one-way ANOVA. Data are shown as mean  $\pm$  s.d.;  $n = 3$  (technical replicates). \*\*\*P < 0.001, \*\*P < 0.01, ns, not significant.

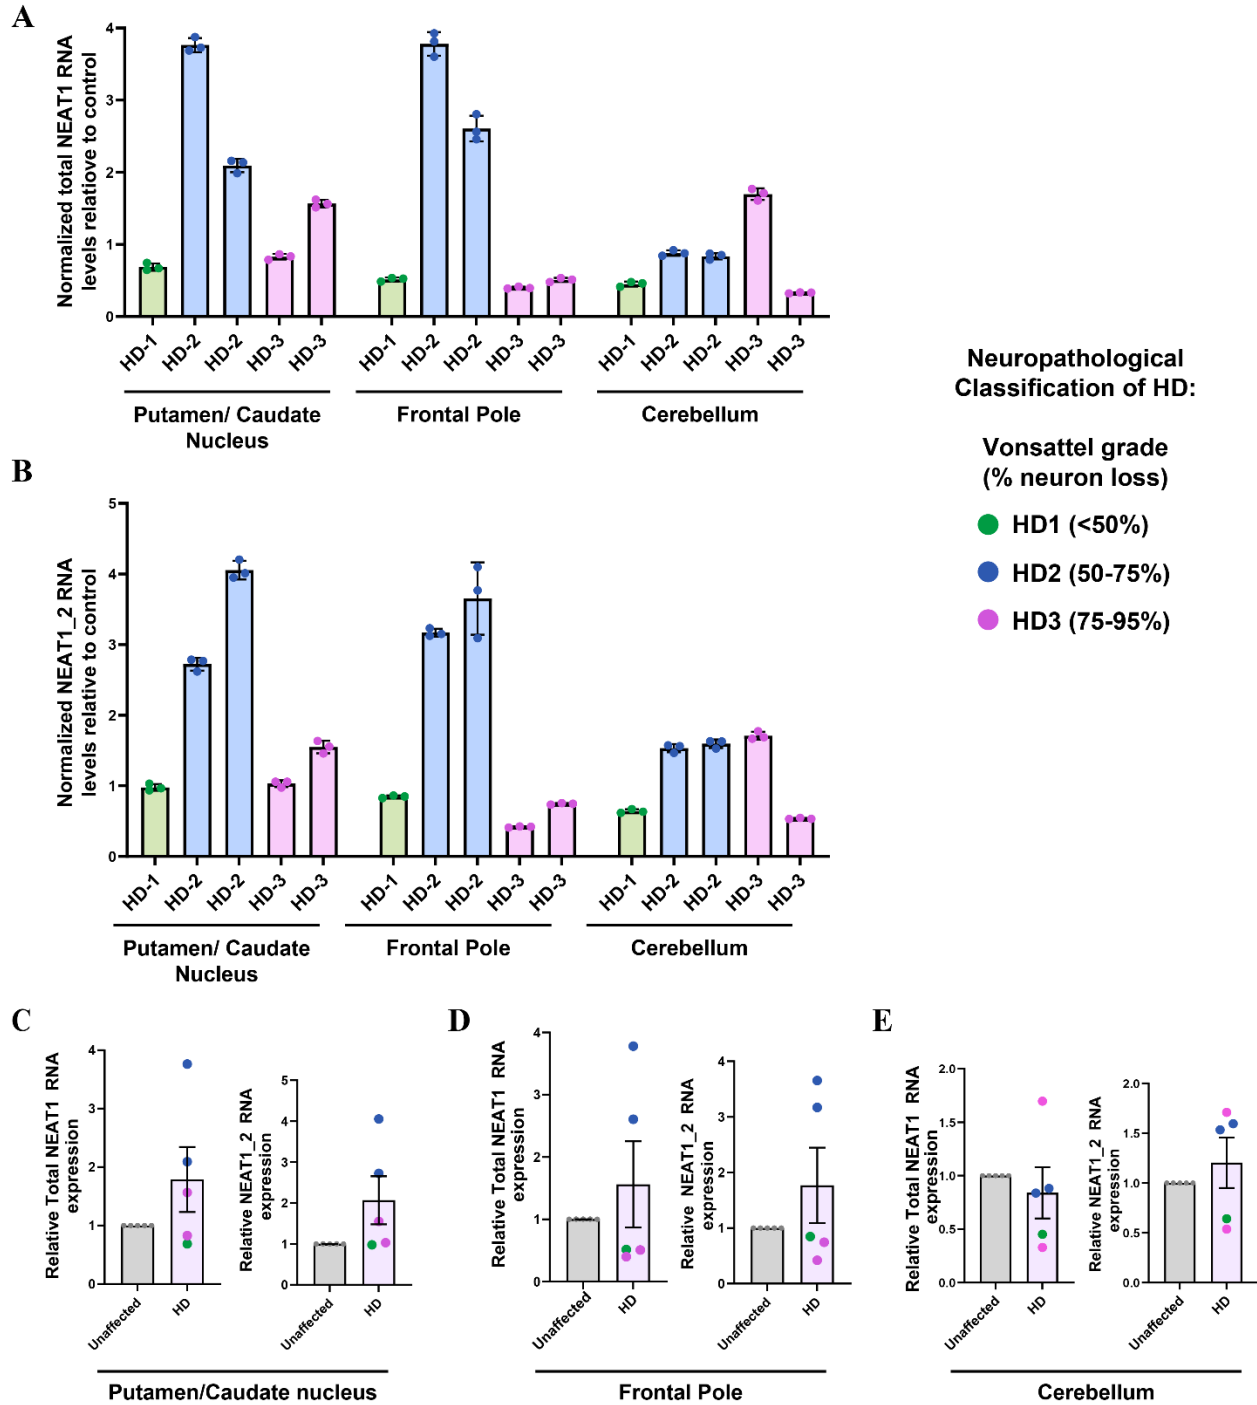

**Fig. S6. Altered lncRNA NEAT1 levels in HD patient brain tissues (A-B)** Total NEAT1 (A) and long NEAT1 (NEAT1\_2) (B) expression levels in putamen, frontal pole, and cerebellum regions of human HD patient brain at different HD-grades. The HD patient tissues were normalized to age and sex matched unaffected brain tissues for each region, N = 5 HD (i.e. 1 individual from stage-1 HD, 2 individuals from stage-2 and 2 individuals from stage-3, total=5 individuals) and N=5 unaffected individuals/group/tissue, dots on bars represent 3 technical replicates/person. Green, blue and purple color of the dots indicate striatal neuropathological grade (HD 1–3), gray



dots indicate unaffected controls. **(C-E)** Both isoform specific NEAT1 (total NEAT1) and NEAT1\_2 expression levels in putamen, frontal pole, and cerebellum regions of human HD patient brain compared to age and sex matched unaffected brain tissues (gray) for each region. N = 5 HD and N = 5 unaffected individuals/group/tissue, average of 3 technical replicates/person. The color of dots indicates striatal neuropathological grade (HD 1–3). U6 was used as a control gene. No statistics applied due to limited patient sample size.

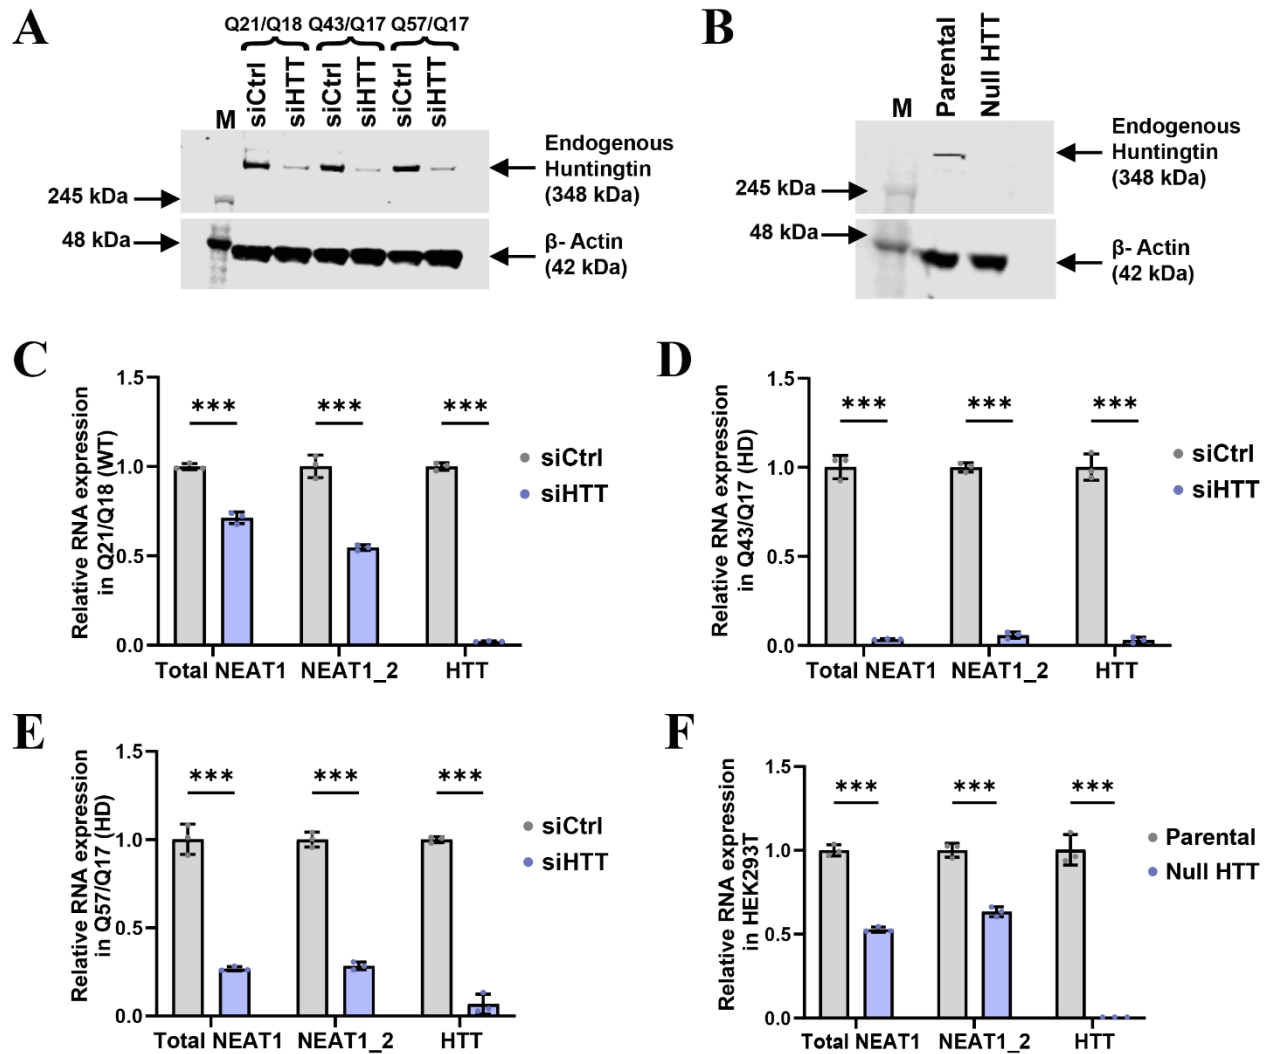

**Fig. S7. HTT knockdown reduces lncRNA NEAT1 levels.** (A) Western blot analysis of HTT protein knockdown by siRNAs in WT (Q21/Q18), HD (Q43/Q17) and HD (Q57/Q17) fibroblast cell lines. (B) Western blot analysis of HTT expression in parental and HTT knockout HEK293T cells. (C-E) RT-qPCR quantification of levels of lncRNA NEAT1 isoforms upon HTT knockdown by siRNAs in WT (Q21/Q18), HD (Q43/Q17) and HD (Q57/Q17) fibroblasts, respectively. (F) RT-qPCR quantification of levels of lncRNA NEAT1 isoforms in HEK293T parental and Null HTT cell lines. U6 was used as control gene and data were analyzed using 2-way ANOVA. Data are shown as mean  $\pm$  s.d.;  $n = 3$  (three technical replicates). \*\*\* $P < 0.001$ .

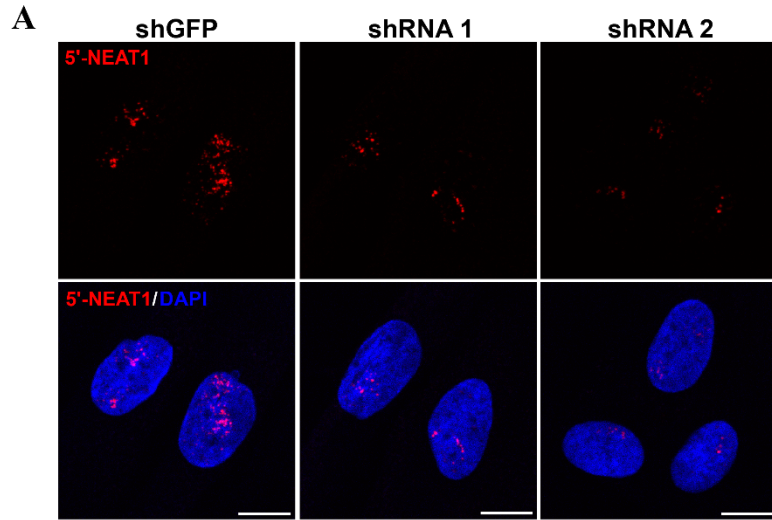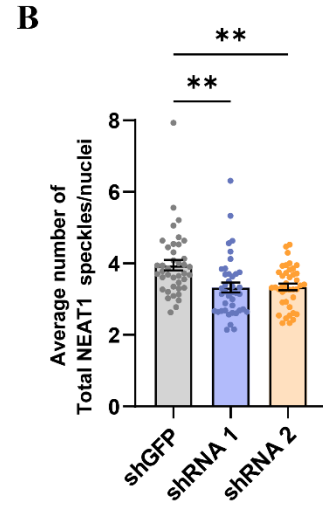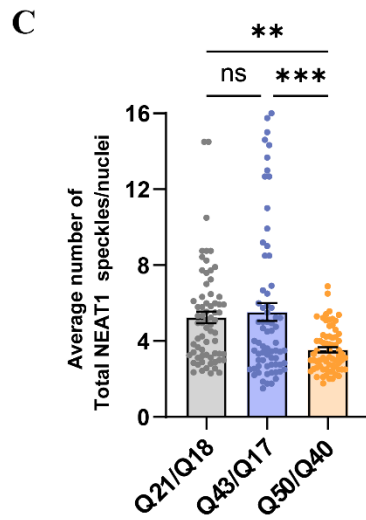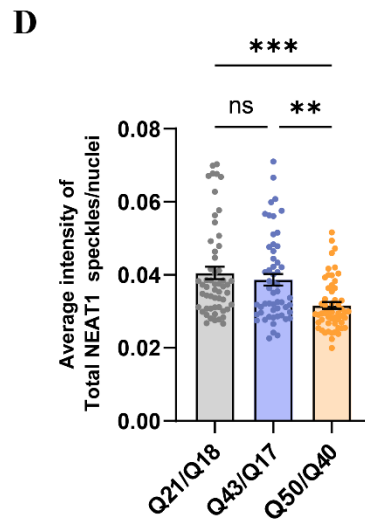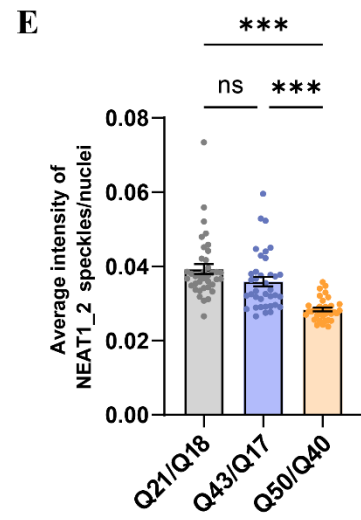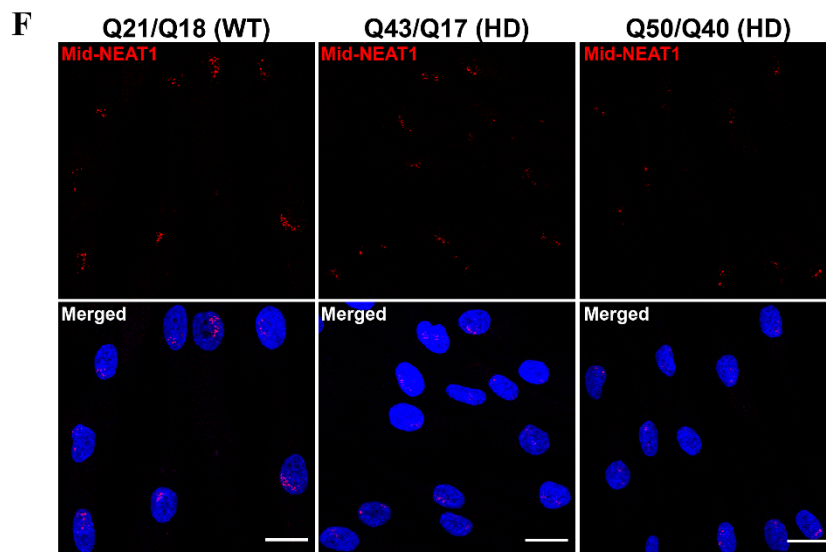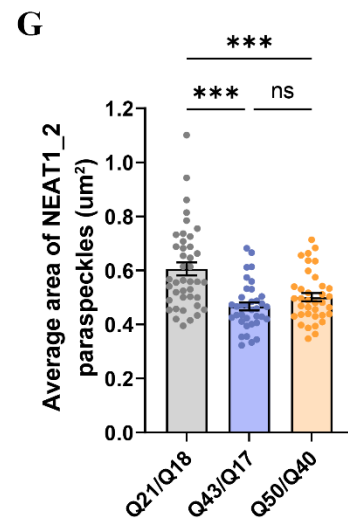

**Fig. S8. NEAT1 lncRNA levels reduce after HTT knockdown (A-B)** Representative images (A) and quantification (B) of Total NEAT1 positive foci in Q21Q18 fibroblast cell lines after HTT knockdown, assessed by FISH. Scale bar = 10  $\mu\text{m}$ . For statistical analysis of the Total NEAT1 RNA foci, CellProfiler software was used, and images were processed using ImageJ (Fiji app). Data represent mean  $\pm$  sem. Data were analyzed by ordinary one-way ANOVA with Tukey's test for multiple comparisons. \*\*\*P < 0.001. (C) Quantification of average number of Total NEAT1 foci in WT and HD fibroblast cell lines. (D-E) Quantification of average intensity of Total NEAT1 and NEAT1\_2 foci in WT and HD fibroblast cell lines. (F-G) Representative images (F) and quantification (G) of NEAT1\_2 foci's average area ( $\mu\text{m}^2$ ) in WT and HD fibroblasts. Scale bar = 20  $\mu\text{m}$ . Data represents mean  $\pm$  sem. Data were analyzed by ordinary one-way ANOVA with multiple comparisons. N=3 (biological replicates). \*\*\*P < 0.001, \*\*P < 0.01 and ns, not significant.

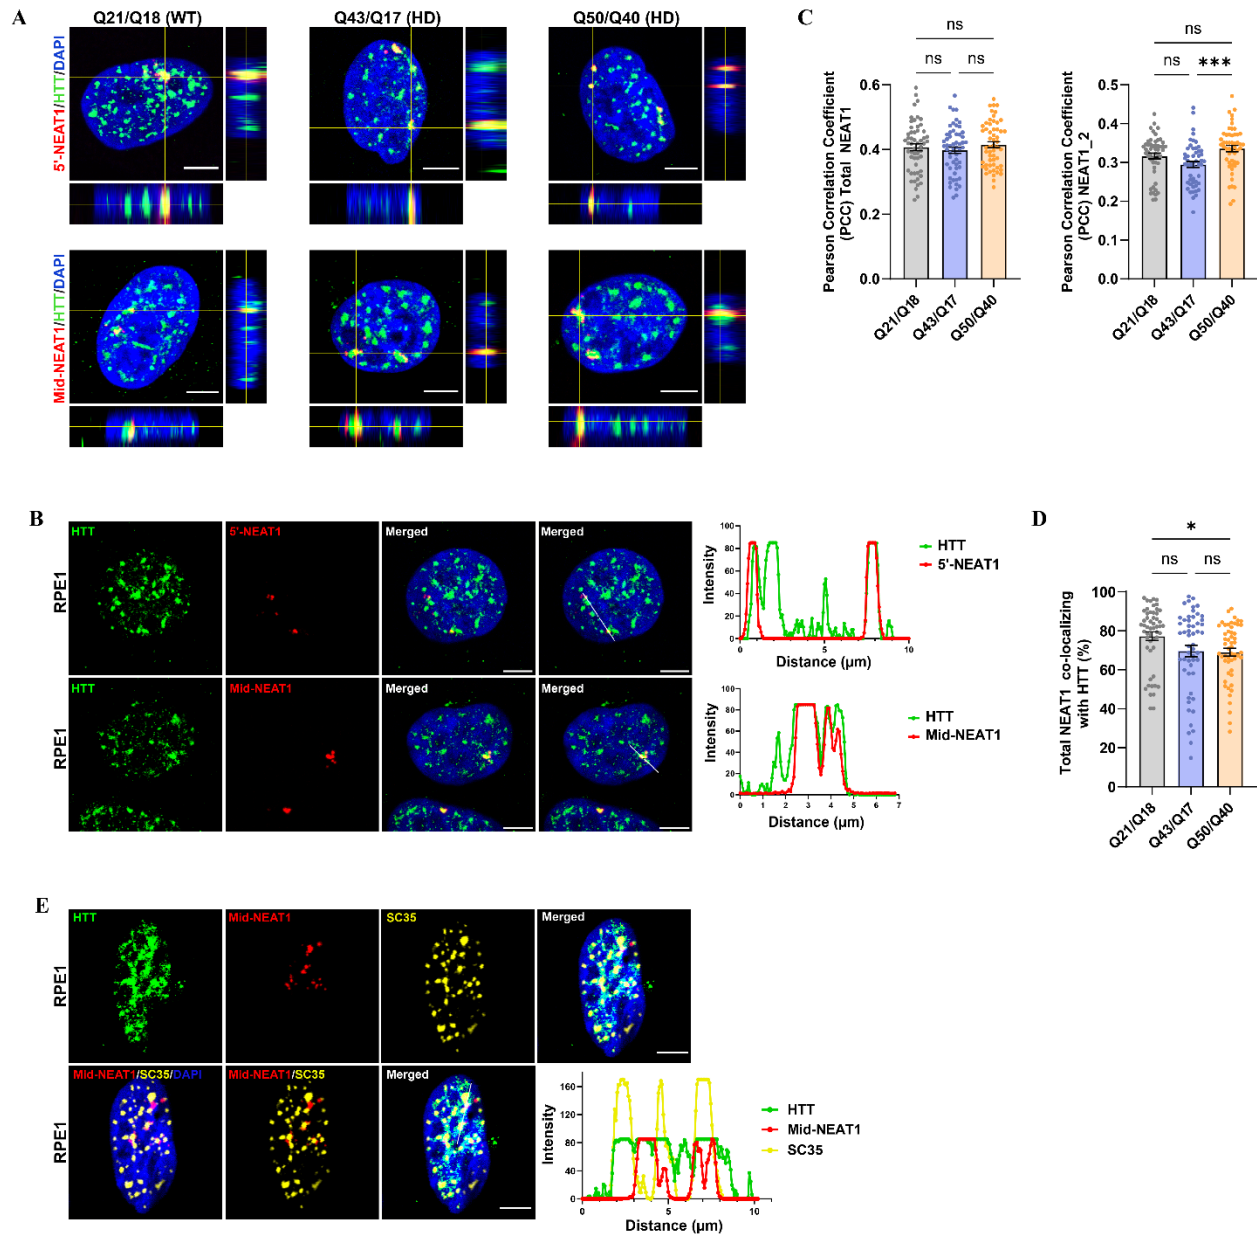

**Fig. S9. NEAT1 lncRNA and HTT protein co-localization** (A) Co-localization of HTT (green) and NEAT1 (Red), for all sets of orthogonal view images for WT and HD fibroblasts, the large image shows the x-y view, the bottom image shows the z-x and the right image shows the z-y. Scale bar indicates 5 $\mu\text{m}$ . (B) Confocal images showing co-localization of HTT (green) and NEAT1 (Red) in RPE1 cells. Quantitation of HTT and NEAT1 co-localization (performed using ImageJ). Scale bar indicates 5 $\mu\text{m}$ . (C) The graph shows Pearson's correlation coefficient for HTT and NEAT1 co-localization analysis in WT and HD fibroblasts. JACoP in ImageJ were used, and images were processed using ImageJ. Data represents mean  $\pm$  sem; N=3 (biological replicates). (D) The percentage of total NEAT1 co-localized with HTT in WT and HD fibroblasts was quantified using the JACoP in ImageJ. Data represents mean  $\pm$  sem. Data were analyzed by ordinary one-way ANOVA with multiple comparisons. \*\*\*P < 0.001 and \*P < 0.05, ns, not significant. (E) Co-localization of HTT (green) with NEAT1\_2 (red) and SC35+ nuclear speckles

(yellow) in RPE1 cells. Quantitation of HTT, NEAT1 and SC35+ nuclear speckles co-localization (performed using ImageJ). Scale bar indicates 5 $\mu$ m.

**Table S1. List of RNA and DNA substrates used in this study.**

| No. | Substrate Name                | Nucleotide Sequence (5'→3')                                                                                                                                                                                                                                              |
|-----|-------------------------------|--------------------------------------------------------------------------------------------------------------------------------------------------------------------------------------------------------------------------------------------------------------------------|
| 1.  | 100-mer random ssRNA          | RNA 100-mer:<br>CACGUAUGAGAAGGUUUUGCCCCGAUAAUCA<br>AUACCCCAGGCUUCUAACUUUUUCCACTCGCU<br>UGAGCCGGCUAGGCCUUUCUGCCCCGAAGUUU<br>CGAUGG                                                                                                                                        |
| 2.  | 100bp random dsDNA            | DNA 100-mer:<br>CACGTATGAGAAGGTATTTGCCCGATAATCAA<br>TACCCCAGGCTTCTAACTTTTTCCACTCGCTTG<br>AGCCGGCTAGGCCTTTCTGCCCGAAGTTTCGAT<br>GG<br>DNA 100-mer comp:<br>CCATCGAACTTCGGGCAGAAAGGCCTAGCCG<br>GCTCAAGCGAGTGGAAAAAGTTAGAAGCCTGG<br>GGTATTGATTATCGGGCAAATACCTTCTCATAC<br>GTG |
| 3.  | 20-mer rA RNA + 5' FAM        | 5' FAM - AAAAAAAAAA AAAAAAAAAA                                                                                                                                                                                                                                           |
| 4.  | 20-mer rC RNA + 5' FAM        | 5' FAM - CCCCCCCCCC CCCCCCCCCC                                                                                                                                                                                                                                           |
| 5.  | 20-mer rG RNA + 5' FAM        | 5' FAM - GGGGGGGGGG GGGGGGGGGG                                                                                                                                                                                                                                           |
| 6.  | 20-mer rU RNA + 5' FAM        | 5' FAM - UUUUUUUUUU UUUUUUUUUU                                                                                                                                                                                                                                           |
| 7.  | 25-mer Motif-RNA              | 5' FAM-AAUGGAAGGCGAGGCAGGCGGGCGU                                                                                                                                                                                                                                         |
| 8.  | 25-mer Motif-DNA              | 5' FAM-AATGGAAGGCGAGGCAGGCGGGCGT                                                                                                                                                                                                                                         |
| 9.  | 25-mer G to C Mutation<br>RNA | 5' FAM-AAUGCAAGCCGAGCCAGCCGCGCGU                                                                                                                                                                                                                                         |
| 10. | 25-mer Low IGV control<br>RNA | 5' FAM-AGTTTTGAAATAGTCTAATTTATCT                                                                                                                                                                                                                                         |

**Table S2. Demographic characteristics of human postmortem brain tissue.**

| Subject        | Condition | Age (years) | Sex (M/F) | CAG   | Region sampled | COD                                   | PMI (hr) |
|----------------|-----------|-------------|-----------|-------|----------------|---------------------------------------|----------|
| <b>HD</b>      |           |             |           |       |                |                                       |          |
| 1.             | HD-1      | 32          | M         | 17/47 | Put/CN, CB, FP | Submandibular squamous cell carcinoma | 14       |
| 2.             | HD-2      | 65          | M         | 17/43 | Put/CN, CB, FP | Renal failure                         | 14       |
| 3.             | HD-2      | 70          | F         | 17/42 | Put/CN, CB, FP | HD                                    | 8        |
| 4.             | HD-3      | 64          | M         | 27/42 | Put, CB, FP    | Pulmonary thromboembolus              | 18       |
| 5.             | HD-3      | 63          | M         | 22/43 | Put/CN, CB, FP | Pulmonary embolism                    | 16       |
| <b>Control</b> |           |             |           |       |                |                                       |          |
| 1.             | Control   | 22          | M         | 11/23 | Put, CB, FP    | Asphyxia                              | 21       |
| 2.             | Control   | 60          | M         | 10/17 | Put, CB, FP    | Ischaemic heart disease               | 17       |
| 3.             | Control   | 78          | F         | 18/19 | Put/CN, CB, FP | Aortic aneurysm                       | 20       |
| 4.             | Control   | 64          | M         | 13/15 | Put, CB, FP    | Ischemic Heart Disease                | 15.5     |
| 5.             | Control   | 68          | M         | 17/19 | Put, CB, FP    | Coronary atherosclerosis              | 22.5     |

*HD* Huntington's disease, *COD* cause of death, *PMI* postmortem interval, *Put* putamen, *CN* caudate nucleus, *CB* cerebellum, *FP* frontal pole

**Data S1. (separate file)**

List of transcripts enriched in HTT RIP-sequencing for both WT and HD isogenic NPCs and fibroblasts used in this study.
